# Supplementary material for: Germanium–tin alloy nanocrystals for high-performance lithium ion batteries
Source: Royal Society of Chemistry journal article supplement (doi:10.1039/c3cp51366a), 2013-01-01

## Supplementary Information

### Germanium-Tin Alloy Nanocrystals for High-Performance Lithium Ion Batteries

*Yong Jae Cho, Chang Hyun Kim, Hyung Soon Im, Yoon Myung, Han Sung Kim, Seung Heuk Back, Young Rok Lim, Chan Su Jung, Dong Myung Jang, Jeunghye Park, Sang Hoo Lim, Eun Hee Cha, Ki Yoon Bae, Min Seob Song, and Won Il Cho*

**Table S1.** Pressure of TMG and TMT vapors in the closed reactor, used to synthesize the NCs.

| Sample No. | Composition of NC                         | Pressure of precursors (Torr) |     | Pressure ratio of TMT/(TMG+TMT) |
|------------|-------------------------------------------|-------------------------------|-----|---------------------------------|
|            |                                           | TMG                           | TMT |                                 |
| 1          | Ge                                        | 40                            | 0   | 0                               |
| 2          | Ge <sub>0.95</sub> Sn <sub>0.05</sub>     | 40                            | 2   | 0.05                            |
| 3          | Ge <sub>0.9</sub> Sn <sub>0.1</sub>       | 50                            | 5   | 0.1                             |
| 4          | Ge <sub>0.75</sub> Sn <sub>0.25</sub> -Sn | 50                            | 25  | 0.33                            |
| 5          | Ge <sub>0.6</sub> Sn <sub>0.4</sub> -Sn   | 25                            | 25  | 0.5                             |
| 6          | Ge <sub>0.6</sub> Sn <sub>0.4</sub> -Sn   | 20                            | 40  | 0.67                            |
| 7          | Sn                                        | 0                             | 40  | 1                               |

**Fig. S1.** The Sn content of NC products ( $[\text{Sn}]/([\text{Ge}]+[\text{Sn}])$ ) vs. the partial pressure of Sn precursors (TMT) in gas phase ( $p_{\text{TMT}}/(p_{\text{TMG}}+p_{\text{TMT}})$ ). The composition of  $\text{Ge}_{1-x}\text{Sn}_x$ -Sn composite ( $x = 0.1\sim 0.4$ ) was determined by XRD, EDX, and XPS. The  $x$  value of  $\text{Ge}_{1-x}\text{Sn}_x$  alloy NC, which was solely determined using the XRD pattern, is also plotted (blue colored dots), showing that it increased linearly with the fraction of TMT in the gas mixture, but did not increase after 0.4.

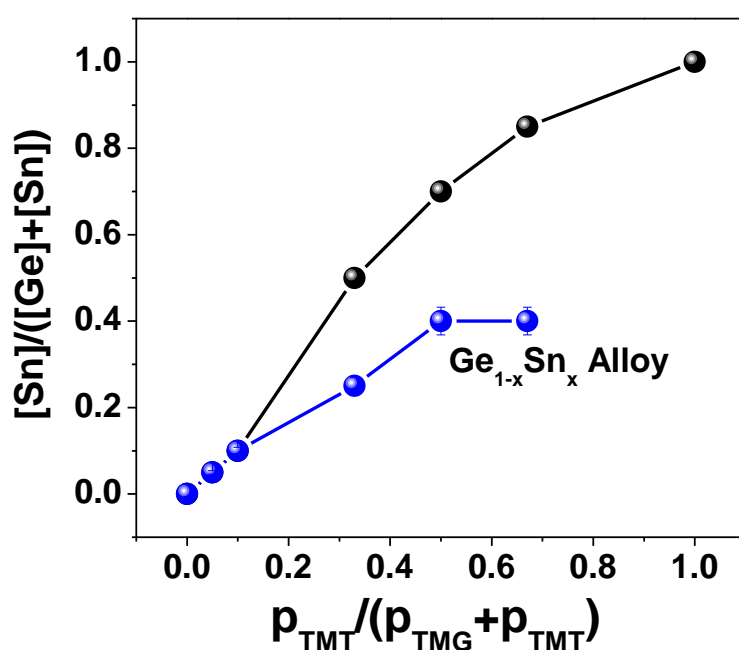

**Fig. S2.** (a) XPS survey scans, and fine-scanned (b) Ge 3d and (c) Sn 3d<sub>5/2</sub> peaks of Ge<sub>1-x</sub>Sn<sub>x</sub> NCs using a photon energy of 600 eV.

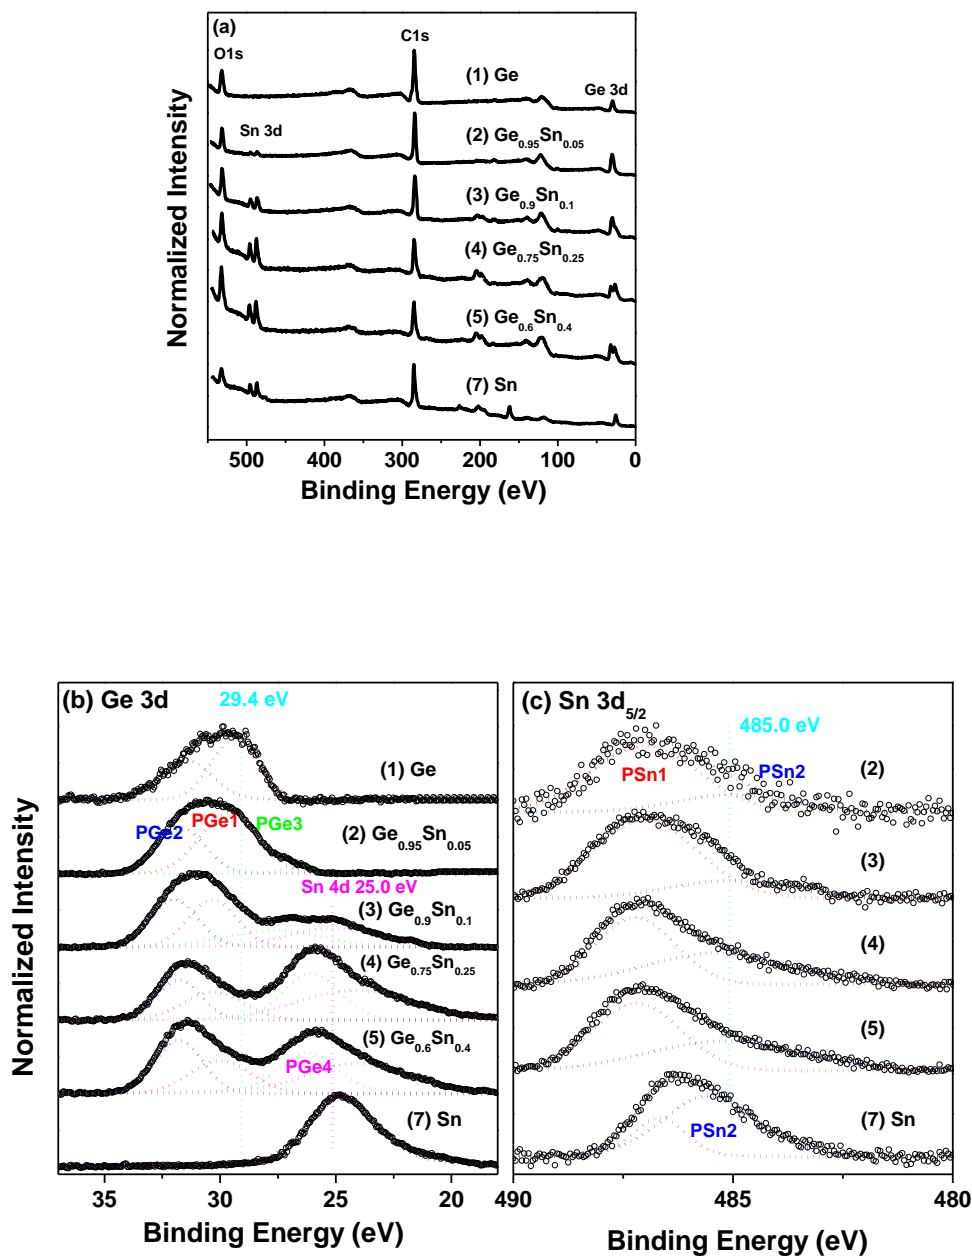

(a) Ge (1) and Sn (7) NC show the Ge and Sn peaks, respectively, and the C peak. The sample (2)~(5) showed the Ge, Sn, and C peaks, whose Sn peak intensity increases with  $x$ .

(b) The Ge (1) NC show an asymmetric peak centered at 29.7 eV, which is blue shifted from the bulk value (29.4 eV). The peak was able to resolve into two bands using the Voigt function, PGe1 (red dotted line) at 29.4 eV and PGe2 (blue dotted line) at 31.4 eV. The binding energy of the Ge atoms bonded to the C atoms is expected to appear at a higher compared to that of the Ge atoms bonded directly to the Ge atoms, based on the Pauling's electronegativity ( $\chi_P$ ) differences between Ge ( $\chi_P = 2.01$ ) and C ( $\chi_P = 2.5$ ). Therefore, the PGe1 and PGe2 bands are assigned to the Ge-Ge and Ge-C bonding structures, respectively. The Sn 4*d* peak of Sn (7) NC appears at ~ 25 eV, which is consistent with that of the bulk Sn metal.

The alloy NCs show a broader peak width than that of Ge. The peak of Ge<sub>0.95</sub>Sn<sub>0.05</sub> was resolved into the PGe1, PGe2, and PGe3 (green dotted line) bands at 29.6 eV, 31.3 eV, and 26.8 eV, respectively, which are assigned to the Ge-Ge, Ge-C, and Ge-Sn bonding structures. The  $\chi_P$  of Sn (1.7) is lower than that of Ge, so the Ge-Sn bonding structure is expected to have a lower binding energy than that of Ge-Ge. As the Sn composition increases, the Sn 4*d* peak appears partly overlapped with the Ge peak. Therefore, the peak of Ge<sub>0.9</sub>Sn<sub>0.1</sub> was resolved into the PGe1, PGe2, PGe3, and PGe4 (magenta dotted line) bands at 30.1 eV, 31.9 eV, 27.0, and 24.8 eV, respectively, which are assigned to the Ge-Ge, Ge-C, Ge-Sn, and Sn-Sn bonding structures. The peak of Ge<sub>0.75</sub>Sn<sub>0.25</sub>-Sn and Ge<sub>0.6</sub>Sn<sub>0.4</sub>-Sn was also resolved into four bonding structures. As  $x$  increases, the fraction of PGe1 band decreases, while that of PGe4 band increases due to the separated  $\beta$ -Sn phase. The peak area % and FWHM of the resolved bands are summarized in Table S2.

**Table S2.** Fitting parameters of Ge 3*d* peaks

| Sample                                    | Peak | Position (eV) | FWHM (eV) | Area (%) |
|-------------------------------------------|------|---------------|-----------|----------|
| (1) Ge                                    | PGe1 | 29.4          | 2.4       | 58       |
|                                           | PGe2 | 31.4          | 2.5       | 42       |
| (2) Ge <sub>0.95</sub> Sn <sub>0.05</sub> | PGe1 | 29.6          | 2.9       | 60       |
|                                           | PGe2 | 32.0          | 2.4       | 37       |
|                                           | PGe3 | 26.8          | 1.4       | 3        |
| (3) Ge <sub>0.9</sub> Sn <sub>0.1</sub>   | PGe1 | 30.1          | 3.0       | 40       |
|                                           | PGe2 | 31.9          | 2.5       | 29       |
|                                           | PGe3 | 27.0          | 1.9       | 10       |
|                                           | PGe4 | 24.8          | 3.3       | 21       |
| (4) Ge <sub>0.75</sub> Sn <sub>0.25</sub> | PGe1 | 30.3          | 3.1       | 18       |
|                                           | PGe2 | 32.0          | 2.2       | 19       |
|                                           | PGe3 | 26.1          | 2.9       | 28       |
|                                           | PGe4 | 24.2          | 5.9       | 35       |
| (5) Ge <sub>0.6</sub> Sn <sub>0.4</sub>   | PGe1 | 30.0          | 3.1       | 19       |
|                                           | PGe2 | 31.8          | 2.4       | 24       |
|                                           | PGe3 | 26.2          | 3.0       | 25       |
|                                           | PGe4 | 24.2          | 5.0       | 32       |
| (7) Sn                                    | PGe4 | 24.7          | 3.5       | 100      |

(c) The Sn 3*d*<sub>5/2</sub> binding energy of Sn (7) NC is 486.2 eV, which is higher than that of the bulk Sn (485.0 eV), which is probably due to the bonding structures of the C overlayers based on the Pauling's  $\chi_P$  differences between Sn ( $\chi_P = 1.7$ ) and C ( $\chi_P = 2.5$ ). The peak was resolved by the PSn1 (red dotted line) band at 486.7 eV and the PSn2 (blue dotted line) band at 485.5 eV, corresponding to the Sn-C and Sn-Sn bonding structures, respectively. The Ge<sub>1-x</sub>Sn<sub>x</sub> shows a significantly blue shifted peak centered at 487.2 eV, due to the Sn-Ge bonding structures. As *x* increases, the peak becomes more asymmetric at the lower energy side, due to the separated  $\beta$ -Sn phase. The peak was resolved by the PSn1 band at 487.0~487.2 eV and the PSn2 band at 485.0~485.3 eV, corresponding to the Sn-Ge/Sn-C and Sn-Sn bonding structures, respectively. The peak area % and FWHM of the resolved bands are summarized in Table S3. The fraction of the Sn-Sn bonding structure (PSn2) increases with *x*, which is coherent with the XRD data. At *x* = 0.05 and 0.1, the fraction of PSn2 is very small, due to negligible separation of  $\beta$ -Sn phase.

**Table S3.** Fitting parameters of Sn  $3d_{5/2}$  peak

| Sample                                    | Peak | Position (eV) | FWHM (eV) | Area (%) |
|-------------------------------------------|------|---------------|-----------|----------|
| (2) Ge <sub>0.95</sub> Sn <sub>0.05</sub> | PSn1 | 487.0         | 2.9       | 78       |
|                                           | PSn2 | 485.0         | 3.0       | 22       |
| (3) Ge <sub>0.9</sub> Sn <sub>0.1</sub>   | PSn1 | 487.0         | 2.8       | 80       |
|                                           | PSn2 | 485.1         | 3.2       | 20       |
| (4) Ge <sub>0.75</sub> Sn <sub>0.25</sub> | PSn1 | 487.2         | 2.1       | 54       |
|                                           | PSn2 | 485.3         | 3.9       | 46       |
| (5) Ge <sub>0.6</sub> Sn <sub>0.4</sub>   | PSn1 | 487.2         | 2.4       | 57       |
|                                           | PSn2 | 485.2         | 4.1       | 43       |
| (7) Sn                                    | PSn1 | 486.7         | 1.4       | 27       |
|                                           | PSn2 | 485.5         | 2.1       | 73       |

**Fig. S3.** TGA analysis data of (a) Ge and (b) Sn NCs. In the case of Ge NC, the C oxidation (in air) to CO or CO<sub>2</sub> at 700 °C causes the weight loss by 14%, corresponding to 14 wt.% C. The Sn NC undergoes simultaneously the Sn and C oxidation to gain the weight 120%. The oxidation of 100 g Sn to SnO<sub>2</sub> is expected to increase the weight by 127%. The weight increase of 120% implies that the C content 7 wt.% is lost. EDX data shows that average C content of (c) Ge and (d) Sn NC is about 50 atomic %, corresponding to 17 wt.%. Elemental analysis data provides that C = 17.6 wt.%, H = 1.6 wt.%. Therefore the C content is estimated to be avg. 15 wt.%.

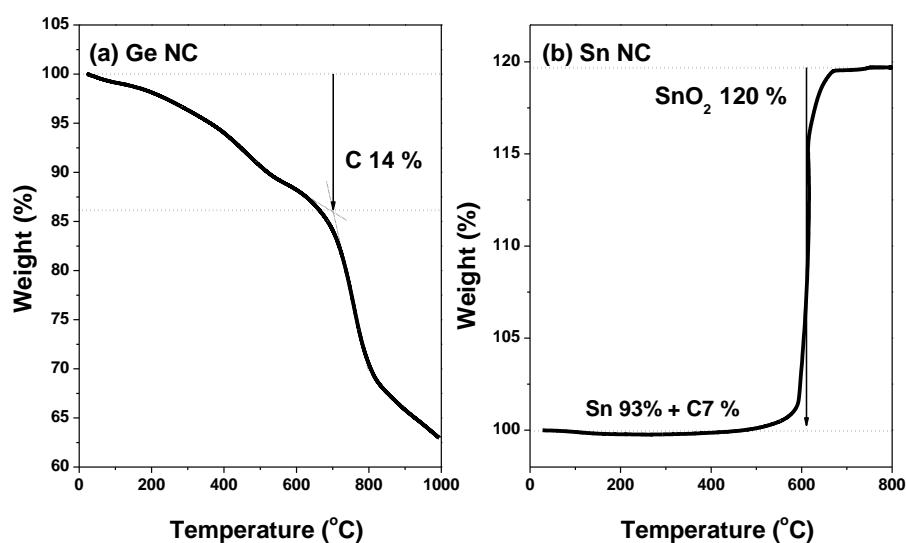

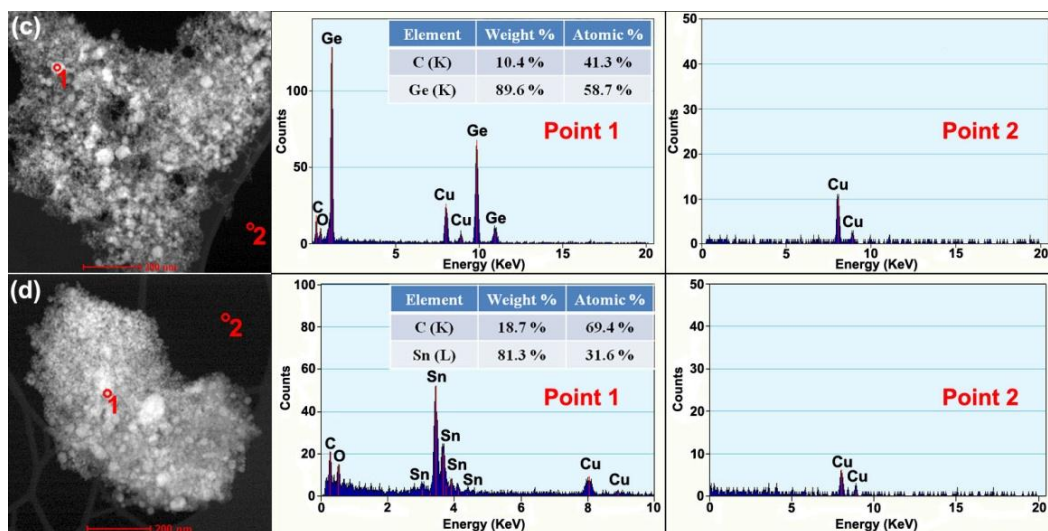

**Fig. S4.** Coulombic efficiency vs. cycle number for charge/discharge capacity of Ge (Ref. 15),  $\text{Ge}_{0.95}\text{Sn}_{0.05}$ ,  $\text{Ge}_{0.9}\text{Sn}_{0.1}$ , and Sn NC with a rate of 0.1C.

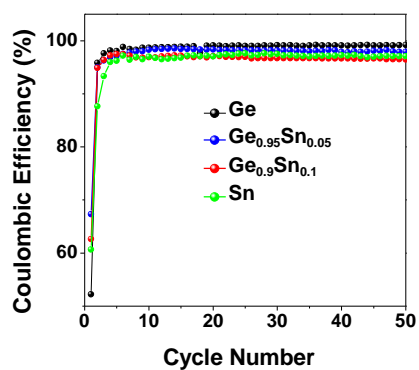

Supplement: c3cp51366a.pdf [file c3cp51366a.pdf]
